# Supplementary material
Source: Springer Nature journal article supplement (https://www.springermedizin.de/resource/supplementary/12871_2013_183_MOESM2_ESM.pdf/9429020)

**A**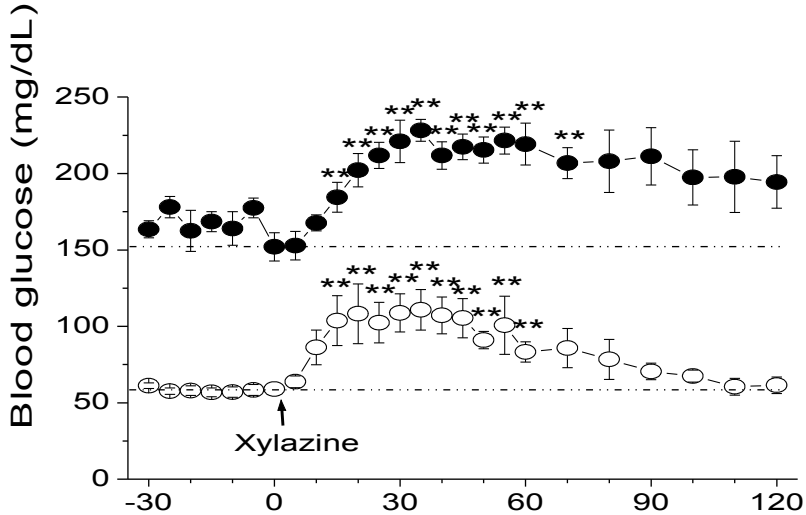**B**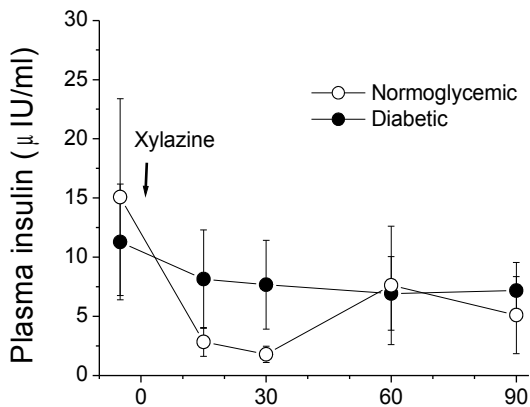**C**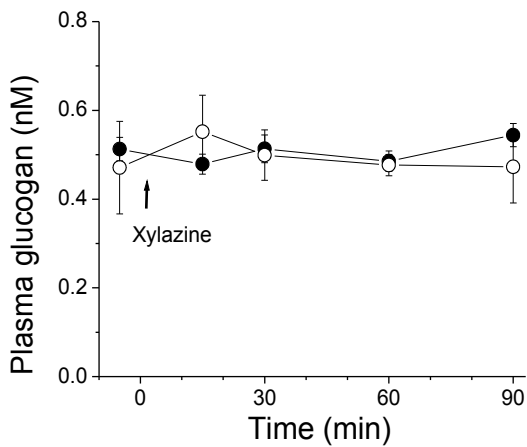

Supplement: MOESM2 [file 9429020]
